# Supplementary material for: MOF-derived microporous carbon as a better choice for Na-ion batteries than mesoporous CMK-3
Source: Royal Society of Chemistry journal article supplement (doi:10.1039/c4ra11009a), 2014-01-01
Supplement: c4ra11009a1.pdf [file c4ra11009a1.pdf]

## Supporting Information

### MOF-derived microporous carbon as a better choice for Na-ion batteries than mesoporous CMK-3

Qunting Qu,<sup>\*,a,b</sup> Jiaojiao Yun,<sup>b</sup> Zhongming Wan,<sup>b</sup> Huiyuan Zheng,<sup>b</sup> Tian Gao,<sup>b</sup> Ming Shen,<sup>c</sup> Jie Shao,<sup>\*,a</sup> and Honghe Zheng<sup>\*,b</sup>

<sup>a</sup> College of Chemistry, Chemical Engineering and Material Science, Soochow University, Suzhou Jiangsu 215006, China

<sup>b</sup> College of Physics, Optoelectronics and Energy & Collaborative Innovation Center of Suzhou Nano Science and Technology, Soochow University, Suzhou Jiangsu 215006, China.

<sup>c</sup> Huasheng Chemical Corporation, Zhangjiagang, Jiangsu 215635, China

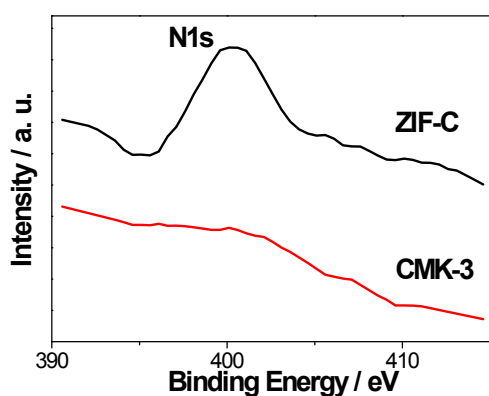

Figure S1 N1s X-ray photoelectron spectra (XPS) of ZIF-C and CMK-3.

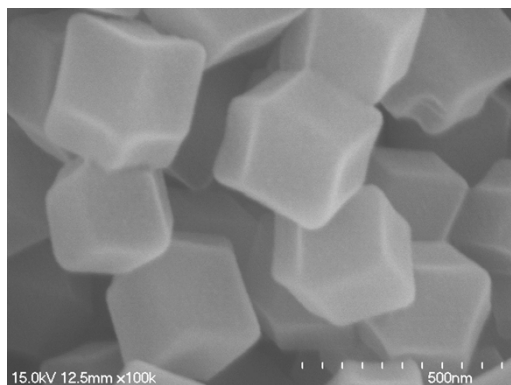

Figure S2 SEM image of ZIF-C carbon polyhedrons.

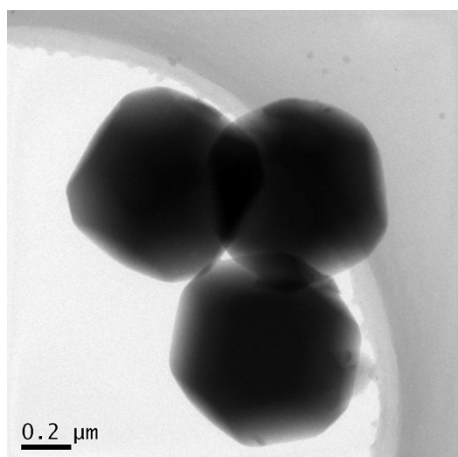

Figure S3 TEM image of ZIF-C carbon polyhedrons.
